# Supplementary material for: Simple and sustainable synthesis of perovskite-based optoelectronic material: CsPbBr3 nanocrystals via laser ablation in alcohol
Source: Royal Society of Chemistry journal article supplement (doi:10.1039/d2na00596d), 2022-01-01
Supplement: d2na00596d1.pdf [file d2na00596d1.pdf]

# Supplementary Information

## Simple and Sustainable Synthesis of Perovskite-based Optoelectronic Material: CsPbBr<sub>3</sub> Nanocrystals via Laser Ablation in Alcohol

*Simone Sansoni, Filippo M. Anoè, and Moreno Meneghetti* \*

Department of Chemical Sciences, University of Padua, Padua 35131, Italy

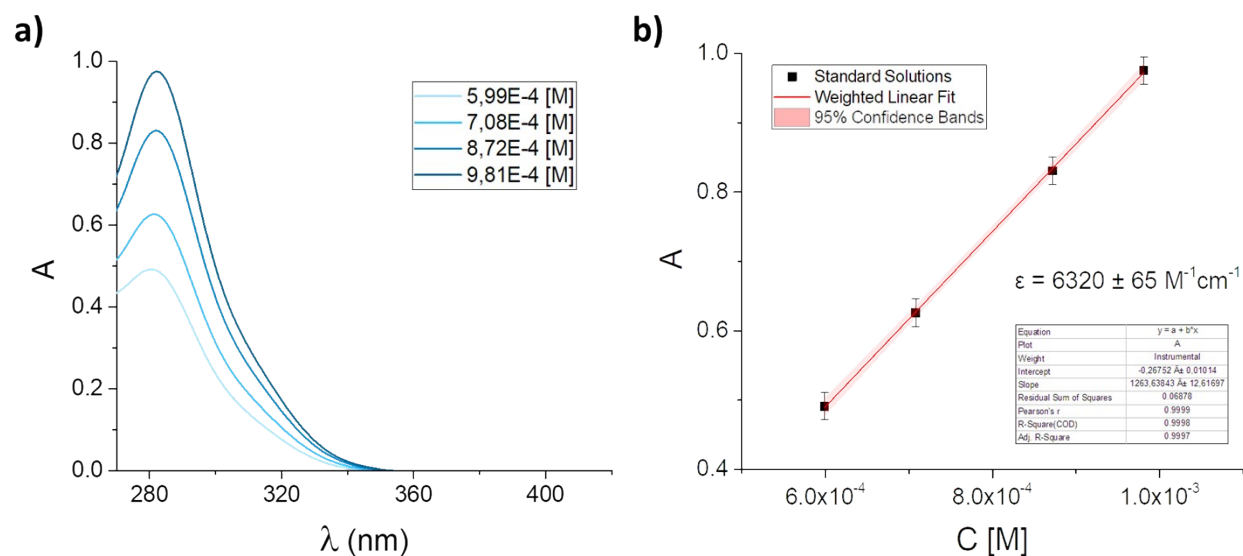

**Figure S1.** Evaluation of PbBr<sub>2</sub> molar extinction coefficient ( $\epsilon_{\text{PbBr}_2}$ ). a) UV-Vis spectra of standard solutions prepared by dissolving PbBr<sub>2</sub> powders in N,N-dimethylformamide (DMF). b) Weighted linear fit made by evaluating the Abs peak at 282 nm as a function of concentration. By the Lambert-Beer law,  $\epsilon_{\text{PbBr}_2}$  is proportional to the angular coefficient of the calibration line. The concentration of PbBr<sub>2</sub> NCs colloidal solutions was determined by centrifugating the solutions for 15 min at 30000 RCF, digesting the precipitate in DMF and then evaluating the Abs peak at 282 nm.<sup>1</sup>

| SOLVENT                        | SAFETY & HEALTH |         |           | INK PROCESSABILITY   |                   |                         | INTERACTION w. PEROVSKITE |                   |                  | USED IN THIS WORK |
|--------------------------------|-----------------|---------|-----------|----------------------|-------------------|-------------------------|---------------------------|-------------------|------------------|-------------------|
|                                | BP (°C)         | FP (°C) | TLV (ppm) | $\eta$ (mPa·s, 25°C) | $P_V$ (kPa, 25°C) | $\sigma$ (dyn/cm, 20°C) | Relative polarity         | $\epsilon$ (20°C) | $D_N$ (kcal/mol) |                   |
| Acetonitrile                   | 82              | 6       | 20        | 0.36                 | 11.83             | 29.1                    | 0.460                     | 38.0              | 14.1             |                   |
| $\gamma$ -Butyrolactone        | 204             | 98      | 20        | 1.75                 | 0.06              | 44.6                    | 0.420                     | 41.0              | 17.8             |                   |
| N,N-Dimethylformamide          | 153             | 58      | 10        | 0.79                 | 0.52              | 36.4                    | 0.386                     | 36.1              | 26.6             |                   |
| N,N-Dimethylpropyleneurea      | 246             | 120     | 20        | 3.41                 | 0.20              | 41.0                    | 0.350                     | 36.1              | 33.0             |                   |
| 1,3-dimethyl-2-imidazolidinone | 222             | 114     | 20        | 1.43                 | <0.1              | 41.0                    | 0.352                     | 37.6              | 27.7             |                   |
| Dimethyl sulfoxide             | 189             | 95      | 50        | 1.98                 | 0.08              | 43.5                    | 0.444                     | 45.0              | 29.8             |                   |
| N-metil-2-pirrolidone          | 202             | 91      | 20        | 1.65                 | 0.05              | 40.7                    | 0.355                     | 32.8              | 27.3             |                   |
| Anisole                        | 154             | 43      | 10        | 0.79                 | 0.47              | 35.0                    | 0.198                     | 4.3               | 9.0              |                   |
| Chlorobenzene                  | 132             | 23      | 10        | 0.81                 | 1.60              | 33.5                    | 0.188                     | 5.6               | 10.0             |                   |
| Chloroform                     | 61              | /       | 10        | 0.54                 | 26.27             | 27.2                    | 0.259                     | 4.8               | 4.0              |                   |
| Ethyl acetate                  | 77              | -4      | 400       | 0.43                 | 12.43             | 23.8                    | 0.228                     | 6.0               | 17.1             |                   |
| Butyl acetate                  | 126             | 22      | 200       | 0.74                 | 1.53              | 25.1                    | 0.178                     | 5.1               | 15.0             |                   |
| Diethyl ether                  | 35              | -45     | 400       | 0.22                 | 70.92             | 17.0                    | 0.120                     | 4.3               | 19.2             |                   |
| Toluene                        | 111             | 4       | 20        | 1.17                 | 3.79              | 28.4                    | 0.099                     | 2.4               | 0.1              |                   |
| Methanol                       | 65              | 12      | 200       | 0.54                 | 16.93             | 22.5                    | 0.762                     | 32.6              | 19.0             | <b>x</b>          |
| Ethanol                        | 78              | 13      | 1000      | 1.07                 | 7.91              | 22.4                    | 0.654                     | 24.5              | 19.2             | <b>x</b>          |
| Isopropanol                    | 82              | 12      | 400       | 2.04                 | 6.05              | 21.8                    | 0.546                     | 19.9              | 21.1             | <b>x</b>          |
| tert-Butanol                   | 82              | 11      | 100       | 3.77                 | 5.43              | 20.7                    | 0.389                     | 10.9              | 21.9             | <b>x</b>          |
| tert-Pentanol                  | 102             | 20      | 200       | 3.79                 | 2.22              | 23.6                    | 0.318                     | 5.8               | >22              | <b>x</b>          |
| Triethylcarbinol               | 143             | 38      | 100       | >3.85                | 0.24              | 26.9                    | 0.290                     | 3.2               | >23              | <b>x</b>          |
| Water                          | 100             | /       | /         | 0.89                 | 3.17              | 72.8                    | 1.000                     | 81.0              | 33.0             |                   |

**Figure S2.** Solvent evaluation based on environmental, health and safety (EHS) guidelines reported in literature.<sup>2,3</sup> The table reports the main physicochemical properties of commonly used perovskite solvents (red) and antisolvents (blue), as well as those of alcohols used in this work (green). Solvent properties were classified based on their impact on safety and health, ink processability and their interaction with metal halide perovskite materials (boiling point BP, flash point FP, threshold limit value TLV,<sup>4,5</sup> viscosity  $\eta$ , vapor pressure  $P_V$ , surface tension  $\sigma$ , dielectric constant  $\epsilon$ , donor number  $D_N$ <sup>6,7</sup>). Ranges of values were reported when no reference parameters have been identified in the literature

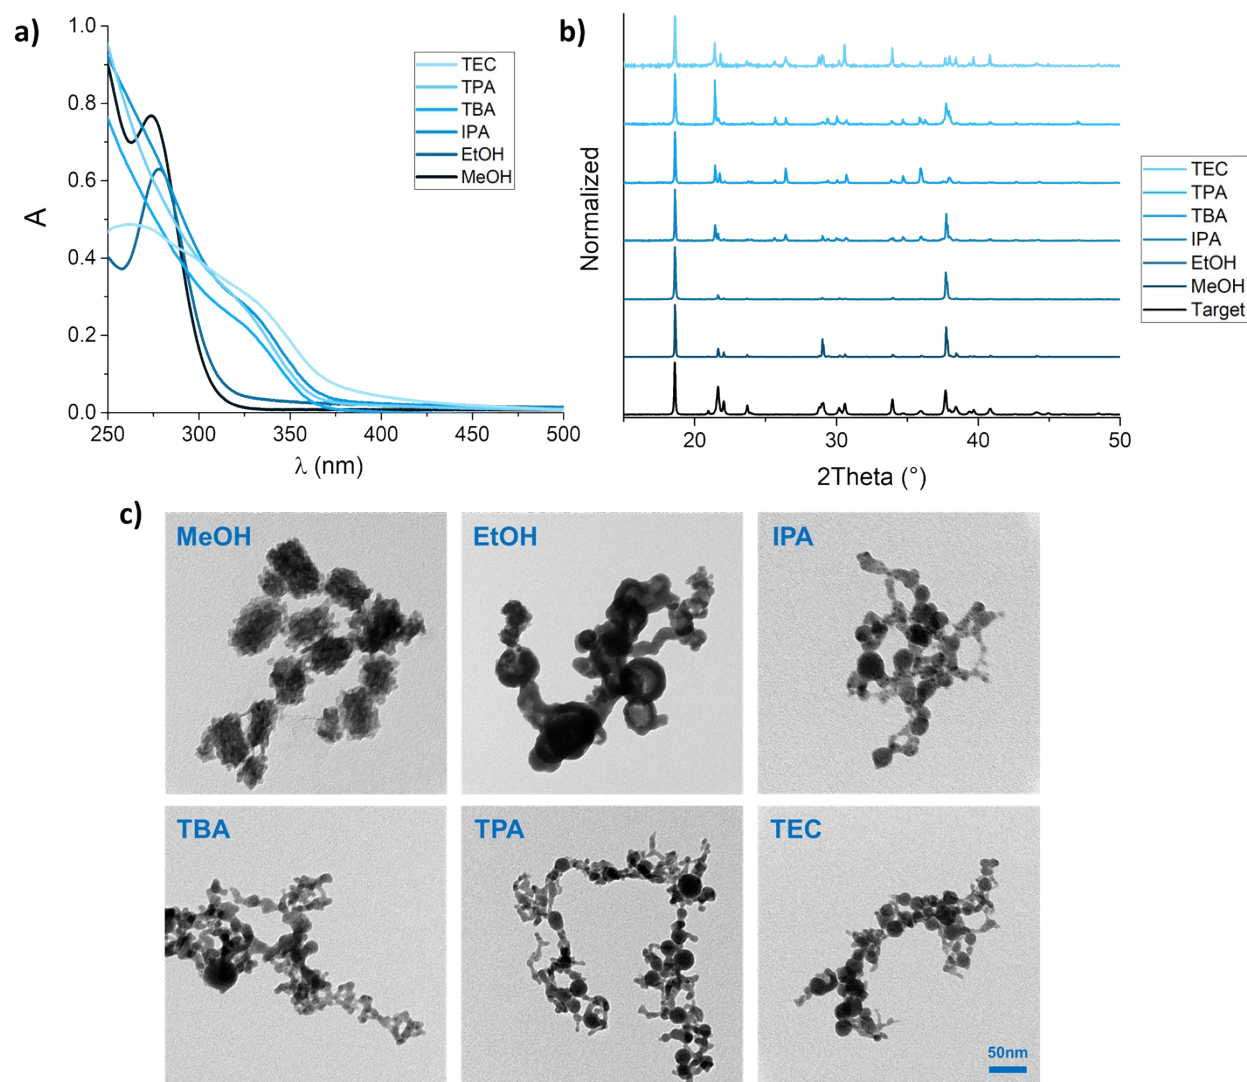

**Figure S3.** Optical and morphological characterization of PbBr<sub>2</sub> NCs precursor solutions synthesized by LASiS in alcohols. a) The typical lead bromide absorption edge at 350 nm can be observed in UV-Vis spectra,<sup>8</sup> while peaks around 275 nm in MeOH and EtOH spectra were attributed to bromo-plumbate complexes in solution.<sup>1</sup> b) The different relative intensities of reflections in XRD patterns can be ascribed to preferential orientation of the NCs onto the substrate and/or to different NCs morphologies, as noticed in c) by TEM images.

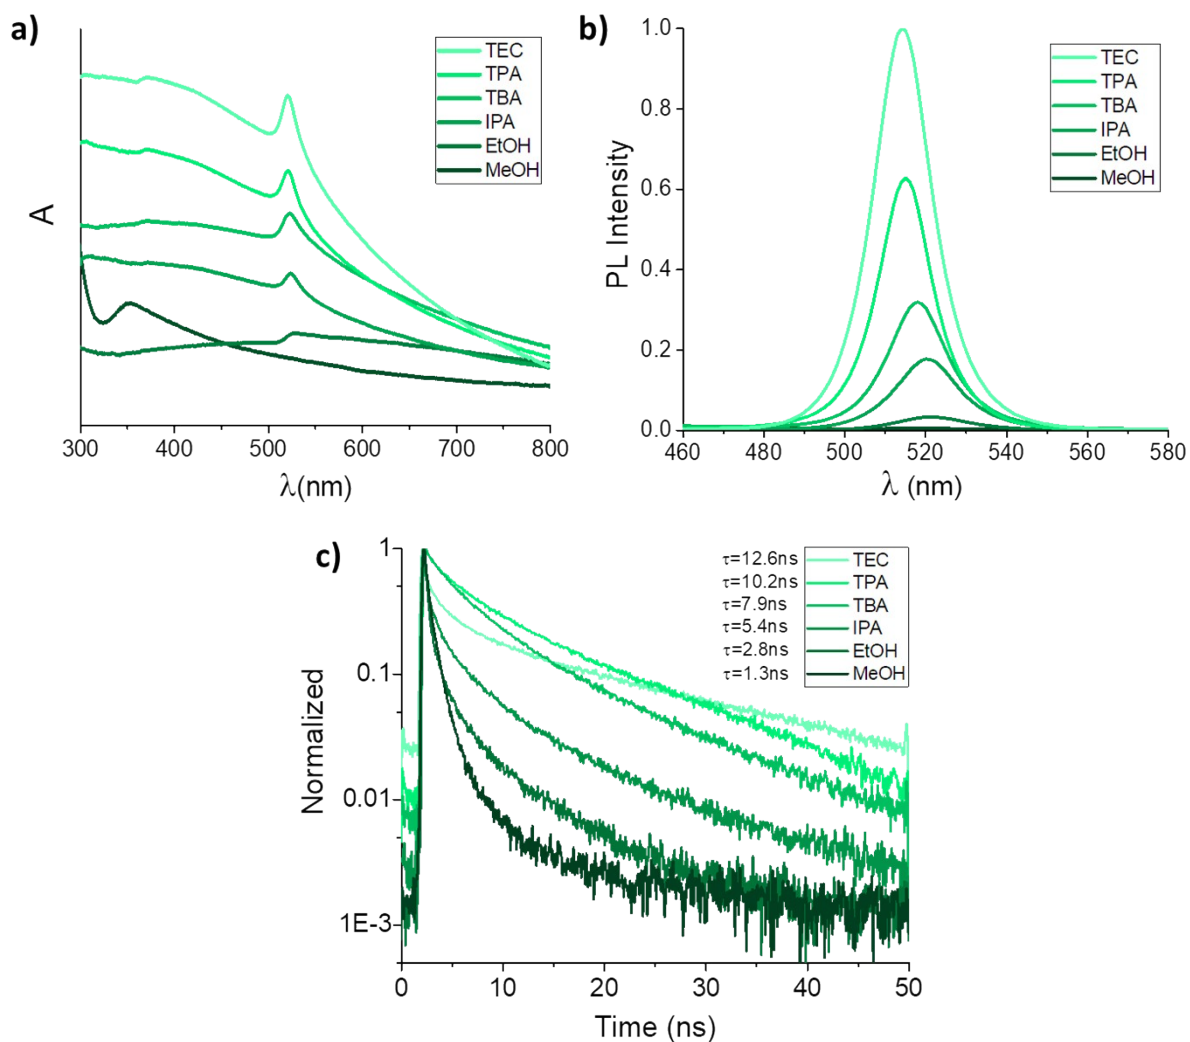

**Figure S4.** a) UV-Vis spectra, b) steady-state PL measurements, and c) time-resolved PL decays of CsPbBr<sub>3</sub> NCs synthesized by 2-step conversion in different alcohols. PL profiles are normalized to the intensity of the respective absorption peak. The intensity-averaged lifetimes were estimated by three-exponential fit.<sup>9,10</sup>

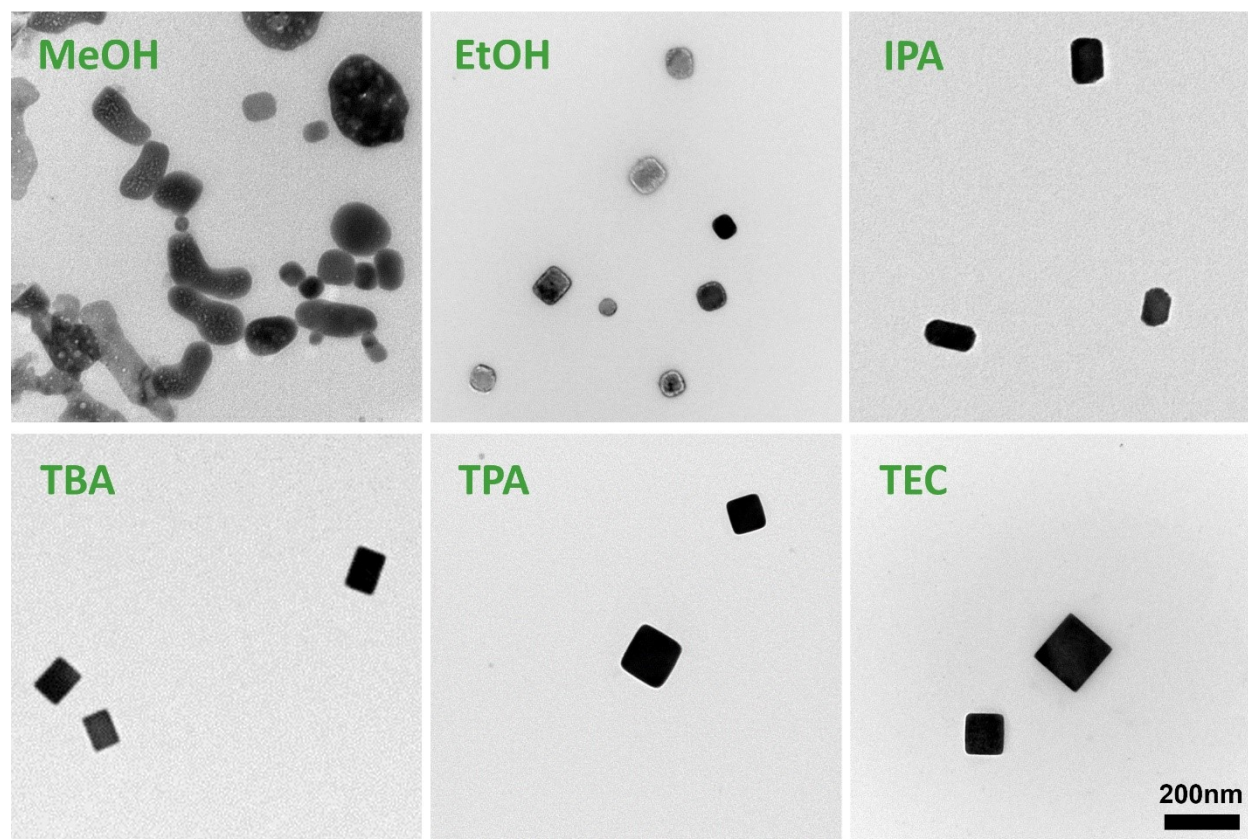

**Figure S5.** TEM images of CsPbBr<sub>3</sub> NCs synthesized by 2-step conversion in different alcohols. Nanoparticles with more amorphous shapes are observed in alcohols with higher polarity and dielectric constants (i.e. methanol and ethanol), while cubic-shaped nanocrystals are obtained in alcohols with a more antisolvent-like behavior (i.e. tert-pentanol and triethyl carbinol).



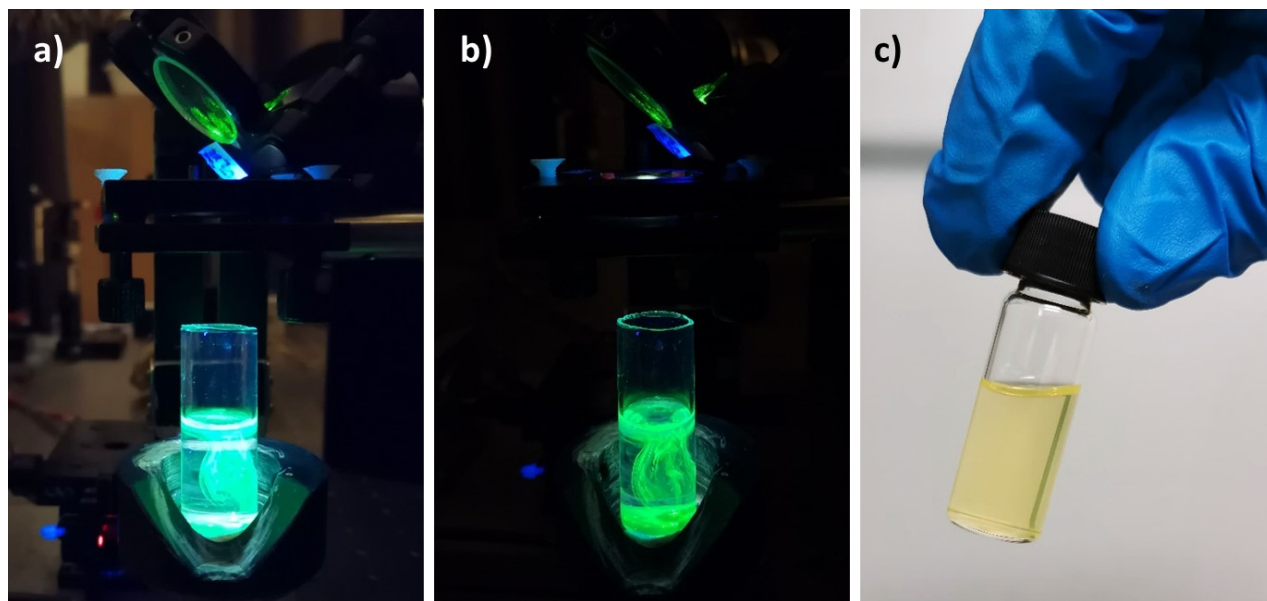

**Figure S6.** 1-step in-situ synthesis of CsPbBr<sub>3</sub> NCs during laser ablation in triethyl carbinol a) under low-intensity visible light and b) in the dark. c) CsPbBr<sub>3</sub> NCs colloidal solution.

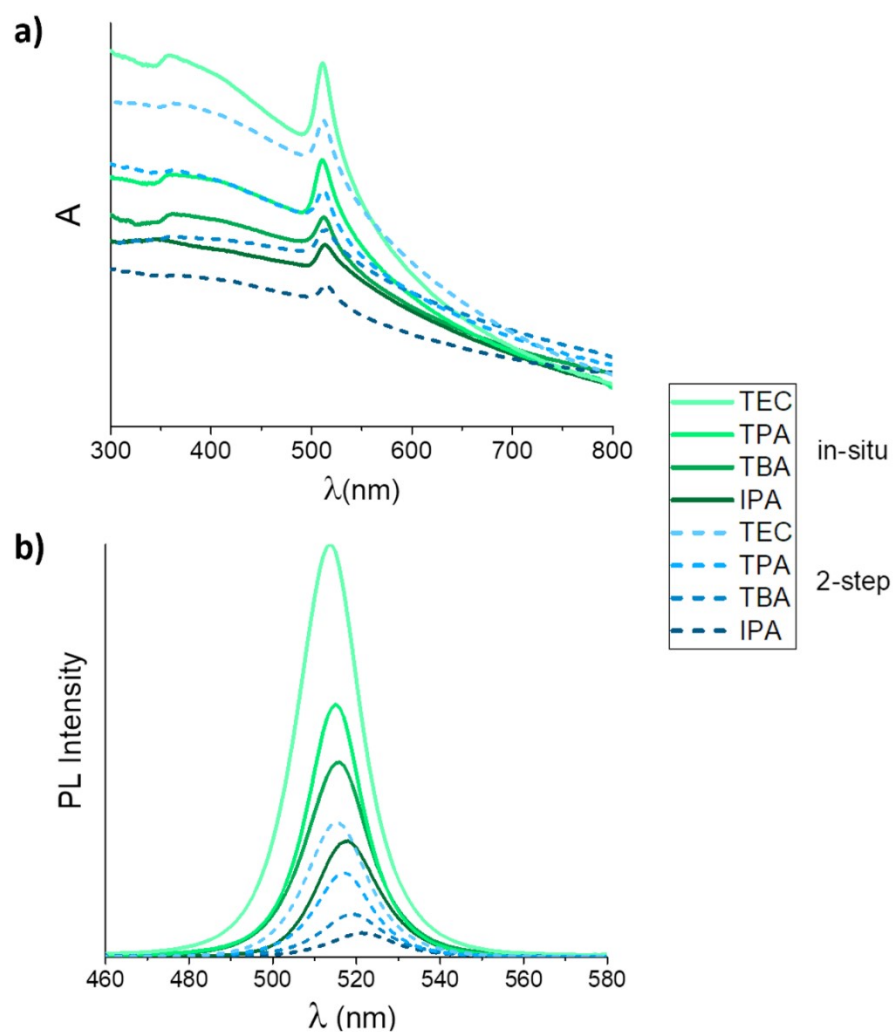

**Figure S7.** Comparison of a) UV-Vis spectra and b) steady-state PL emissions of CsPbBr<sub>3</sub> NCs synthesized by 2-step conversion (dashed lines) and 1-step in-situ (solid lines) synthesis in different alcohols. PL profiles are normalized to the intensity of the respective absorption peak.



| SOLVENT | Z Pot (2-step) | Z Pot (in-situ) |
|---------|----------------|-----------------|
| IPA     | 11.8 mV        | 16.3 mV         |
| TBA     | 13.5 mV        | 15.9 mV         |
| TPA     | 13.2 mV        | 17.7 mV         |
| TEC     | 14.1 mV        | 18.2 mV         |

**Figure S8.** Table reporting the z-potential values obtained for CsPbBr<sub>3</sub> NCs colloidal solutions by the 2-step conversion and the 1-step (in-situ) synthesis protocols. All measurements were performed with a Malvern Instrument Zetasizer Nano operating with a 633 nm He-Ne laser, placing the solutions in a sonication bath for 5 minutes before each measurement.

## References

- (1) Radicchi, E.; Mosconi, E.; Elisei, F.; Nunzi, F.; De Angelis, F. Understanding the Solution Chemistry of Lead Halide Perovskites Precursors. *ACS Appl. Energy Mater.* **2019**, *2* (5), 3400–3409. <https://doi.org/10.1021/acsaem.9b00206>.
- (2) Reichardt, C.; Welton, T. *Solvents and Solvents Effects in Organic Chemistry (Fourth, Updated and Enlarged Edition)*; Wiley-VCH Verlag GmbH & Co. KGaA, 2011. <https://doi.org/10.1016/b978-0-12-416677-6.00029-9>.
- (3) Speight, J. G. *Lange's Handbook of Chemistry*, 17th Editi.; Mc Graw Hill Education, 2017.
- (4) *Strategies and Techniques for Measuring Solvent Vapour Concentrations in the Work Environment - BEST PRACTICE GUIDELINES*; 2018.
- (5) Bessonneau, V.; Clément, M.; Thomas, O. Can Intensive Use of Alcohol-Based Hand Rubs Lead to Passive Alcoholization? *Int. J. Environ. Res. Public Health* **2010**, *7* (8), 3038–3050. <https://doi.org/10.3390/ijerph7083038>.
- (6) Cataldo, F. A Revision of the Gutmann Donor Numbers of a Series of Phosphoramides Including TEPA. *Eur. Chem. Bull.* **2015**, *4* (2), 92–97. <https://doi.org/10.17628/ECB.2015.4.92>.
- (7) Gutmann, V. Solvent Effects on the Reactivities of Organometallic Compounds. *Coord. Chem. Rev.* **1976**, *18* (2), 225–255. [https://doi.org/10.1016/S0010-8545\(00\)82045-7](https://doi.org/10.1016/S0010-8545(00)82045-7).
- (8) Klein, E.; Lesyuk, R.; Klinke, C. Insights into the Formation Mechanism of Two-Dimensional Lead Halide Nanostructures. *Nanoscale* **2018**, *10* (9), 4442–4451. <https://doi.org/10.1039/c7nr09564c>.
- (9) Lignos, I.; MacEiczyk, R. M.; Kovalenko, M. V.; Stavrakis, S. Tracking the Fluorescence Lifetimes of Cesium Lead Halide Perovskite Nanocrystals during Their Synthesis Using a Fully Automated Optofluidic Platform. *Chem. Mater.* **2020**, *32* (1), 27–37. <https://doi.org/10.1021/acs.chemmater.9b03438>.
- (10) Lakowicz, J. R. *Principles of Fluorescence Spectroscopy - Third Edition (Pages 141-144)*; 2011. <https://doi.org/10.1006/abio.2000.4850>.
